# Supplementary material for: MODs vs. NPs: Vying for the Future of Printed Electronics
Source: PubMed Central journal article supplement (PMC8247916; doi:10.1002/chem.202004860), 2021-03-01
Supplement: CHEM-27-8062-s001.pdf [file CHEM-27-8062-s001.pdf]

# Chemistry–A European Journal

Supporting Information

## **MODs vs. NPs: Vying for the Future of Printed Electronics**

Samuel P. Douglas<sup>+</sup>, Shreya Mrig<sup>+</sup>, and Caroline E. Knapp<sup>\*[a]</sup>

The tables below represent the data for every ink listed in the Minireview. For ease of comparison, all conductivity values have been converted to volume resistivity in units of  $\Omega\text{ m}$  (*note*:  $\Omega\text{ m} = (\text{S m}^{-1})^{-1}$ ). Sheet resistance values have not been converted as information is not always given as to the volume of the films. Inks appear in order of their mention and all acronyms are defined in the main text of the Minireview. Detailed descriptions of substrate pre-treatments are not listed here.

**Table S1.** Summary of Ag MOD inks

| Ink composition                                                                   | Substrate/s                                                                    | Deposition technique                                  | Sintering Conditions                                                                             | Resistivity/Resistance                                                                                                                                                  | Reference                  |
|-----------------------------------------------------------------------------------|--------------------------------------------------------------------------------|-------------------------------------------------------|--------------------------------------------------------------------------------------------------|-------------------------------------------------------------------------------------------------------------------------------------------------------------------------|----------------------------|
| Diamminesilver(I) + formic acid                                                   | PET, PI, glass, cellulose-based materials.                                     | Direct-writing, inkjet printing and airbrush spraying | Thermal: 90 °C, 15 min                                                                           | $\rho = 1.60 \times 10^{-8} \Omega\text{ m}$                                                                                                                            | Walker <sup>[16]</sup>     |
| Diamminesilver(I) + formic acid                                                   | PI                                                                             | Drop-coating                                          | Direct laser patterning of ink                                                                   | $\rho = 2.10 \times 10^{-8} \Omega\text{ m}$                                                                                                                            | Liu <sup>[18]</sup>        |
| Diamminesilver(I) + formic acid                                                   | Polyacrylonitrile<br>Polypropylene<br>PET<br>Basalt<br>Cotton                  | Inkjet printing                                       | Thermal: 90 °C, 8 printing and sintering cycles                                                  | $R_s = 0.169 \Omega\text{ sq}^{-1}$<br>$0.177 \Omega\text{ sq}^{-1}$<br>$0.155 \Omega\text{ sq}^{-1}$<br>$0.235 \Omega\text{ sq}^{-1}$<br>$0.389 \Omega\text{ sq}^{-1}$ | Stempien <sup>[19]</sup>   |
| Diamminesilver(I) + formic acid<br>Diamminesilver(I) + formic acid + 0.5 wt.% PVP | Poly(ethylene dioxythiophene):poly(styrene sulfonate) (PEDOT:PSS) buffer layer | Flexography printing                                  | Thermal: 90 °C, 15 min                                                                           | $R_s = 0.700 \Omega\text{ sq}^{-1}$<br>$7.20 \Omega\text{ sq}^{-1}$                                                                                                     | Iannaccone <sup>[20]</sup> |
| Diamminesilver(I) + formic acid                                                   | Paper                                                                          | Inkjet printing                                       | Ar/H <sub>2</sub> plasma sintering at RT, 200 printing and sintering cycles totalling 6 min 40 s | $\rho = 2.60 \times 10^{-8} \Omega\text{ m}$ .                                                                                                                          | Knapp <sup>[21]</sup>      |
| Diamminesilver(I) + formic acid                                                   | PI                                                                             | Inkjet printing                                       | Thermal: 90 °C, 15 min, followed by plasma irradiation for 4 min<br>Thermal only<br>Plasma only  | $\rho = 6.00 \times 10^{-8} \Omega\text{ m}$<br>$1.20 \times 10^{-7} \Omega\text{ m}$<br>$1.00 \times 10^{-6} \Omega\text{ m}$                                          | Wang <sup>[22]</sup>       |
| Silver ammonia + diethanolamine                                                   | PET                                                                            | Inkjet printing                                       | Thermal: 75 °C, 20 min                                                                           | $\rho = 6.00 \times 10^{-8} \Omega\text{ m}$                                                                                                                            | Chen <sup>[23]</sup>       |

|                                                |                   |                                        |                                                                                                                                                                     |                                                                                                                                   |                        |
|------------------------------------------------|-------------------|----------------------------------------|---------------------------------------------------------------------------------------------------------------------------------------------------------------------|-----------------------------------------------------------------------------------------------------------------------------------|------------------------|
| Silver-ethylamine-ethanolamine-formate complex | Glass<br>PEN      | Inkjet printing                        | Thermal: 150 °C, 30 min                                                                                                                                             | $\rho = 4.10 \times 10^{-8} \Omega \text{ m}$<br>$4.70 \times 10^{-8} \Omega \text{ m}$                                           | Vaseem <sup>[24]</sup> |
| Silver-ethylamine-ethanolamine-formate complex | PI                | Inkjet printing                        | Thermal: 80 °C, 5 min, 8 printing and sintering cycles. , followed by 80 °C for 30 min                                                                              | $\rho = 5.95 \times 10^{-8} \Omega \text{ m}$                                                                                     | Vaseem <sup>[25]</sup> |
| Silver-ethanolamine-formate                    | Glass             | Spin-coating                           | Microwave-plasma sintering for 1.5 min                                                                                                                              | $\rho = 7.14 \times 10^{-8} \Omega \text{ m}$                                                                                     | Vaseem <sup>[26]</sup> |
| Silver-ethylamine-ammonia                      | Glass<br>PET      | Spin-coating<br>Inkjet printing        | Thermal: 60 °C, 1 day<br>Thermal: 75 °C, 1 h                                                                                                                        | $\rho = 9.32 \times 10^{-7} \Omega \text{ m}$<br>$3.65 \times 10^{-7} \Omega \text{ m}$                                           | Bhat <sup>[27]</sup>   |
| Silver-isopropanolamine                        | PI                | Mask printing                          | Thermal: 110 °C, 2 h                                                                                                                                                | $\rho = 1.21 \times 10^{-7} \Omega \text{ m}$                                                                                     | Mou <sup>[28]</sup>    |
| Silver neodecanoate + ethyl cellulose          | PI<br>PI<br>Glass | Screen printing<br>Aerosol jet printed | Photonic sintering after drying 75 °C, 15 min<br>Thermal, 230 °C, 10 min after drying 140 °C, 15 min<br>Thermal: 220 °C, 15 min, 10 min after drying 140 °C, 15 min | $\rho = 2.00 \times 10^{-7} \Omega \text{ m}$<br>$8.80 \times 10^{-8} \Omega \text{ m}$<br>$2.80 \times 10^{-8} \Omega \text{ m}$ | Kell <sup>[29]</sup>   |
| Silver neodecanoate + cellulose                | Glass             | Direct-writing                         | Thermal: 115 °C, 1 h                                                                                                                                                | $\rho = 9.00 \times 10^{-8} \Omega \text{ m}$                                                                                     | Shen <sup>[30]</sup>   |
| Silver-diethanolamine-acetate                  | Glass, PET        | Spin-coating                           | Thermal: 100 °C, 10 min, followed by 180 °C, 30 min, 2 layers                                                                                                       | $\rho = 6.67 \times 10^{-8} \Omega \text{ m}$                                                                                     | Xie <sup>[31]</sup>    |
| Silver citrate + 1,2-diaminopropane            | PET<br>Glass      | Inkjet printing<br>Drop-coating        | Thermal: 150 °C, 50 min<br>Thermal: 230 °C, 50 min                                                                                                                  | $\rho = 1.70 \times 10^{-7} \Omega \text{ m}$<br>$3.10 \times 10^{-8} \Omega \text{ m}$                                           | Nie <sup>[32]</sup>    |
| Silver citrate + ethylenediamine               | PI                | Drop-coating                           | Thermal: 200 °C, 1 h                                                                                                                                                | $\rho = 3.90 \times 10^{-7} \Omega \text{ m}$                                                                                     | Yang <sup>[33]</sup>   |

|                                           |       |                    |                                                                      |                                               |                       |
|-------------------------------------------|-------|--------------------|----------------------------------------------------------------------|-----------------------------------------------|-----------------------|
| Silver-amine-oxalate                      | PI    | Drop-coating       | Thermal: 160 °C, 1 h                                                 | $\rho = 8.19 \times 10^{-8} \Omega \text{ m}$ | Yang <sup>[34]</sup>  |
| Silver trifluoroacetate + DMAc + butanone | SIS   | Direct pen writing | Multiple cycles of in-situ chemical reduction, 5 min per cycle       | Line resistance: 80.0 $\Omega \text{ m}^{-1}$ | Hu <sup>[35]</sup>    |
| [(hfac)(1,5-COD)Ag]                       | Glass | Inkjet printing    | Thermal: 120 °C, ~30 min (15 x ~2 min printing and sintering cycles) | $\rho = 4.10 \times 10^{-8} \Omega \text{ m}$ | Black <sup>[36]</sup> |

**Table S2.** Summary of Ag NP inks

| Ink composition                                                | Substrate/s            | Deposition technique | Sintering (Pre-sintering) Conditions                                                                    | Resistivity/Resistance                                                                       | Reference                 |
|----------------------------------------------------------------|------------------------|----------------------|---------------------------------------------------------------------------------------------------------|----------------------------------------------------------------------------------------------|---------------------------|
| Short chain carboxylic acids (C6/C10) capped Ag NPs – C10i ink | PI, Glass, Paper       | Aerosol jet printing | Thermal: 250 °C, 91 h 30 min                                                                            | $\rho = 1.83 \times 10^{-8} \Omega \text{ m}$                                                | Ankireddy <sup>[42]</sup> |
| Short chain carboxylic acid (C10) capped Ag NPs                | PI                     | Aerosol jet printing | Thermal: 240 °C, 1 h                                                                                    | $\rho = 3.38 \times 10^{-8} \Omega \text{ m}$                                                | Ankireddy <sup>[43]</sup> |
| Oleic acid capped Ag NPs                                       | PI<br>PET              | Drop-coating         | Photonic: 2.0 kV, 2 ms (dried at RT for 10 min)<br>2.0 kV for 1.5 ms (dried at RT for 10 min)           | $\rho = 5.10 \times 10^{-8} \Omega \text{ m}$<br>$8.00 \times 10^{-8} \Omega \text{ m}$      | Jo <sup>[44]</sup>        |
| Humic acid capped Ag NPs                                       | Photo-paper            | Inkjet printing      | Thermal: 180 °C, 1 h, 40 printed layers                                                                 | $\rho = 1.35 \times 10^{-6} \Omega \text{ m}$                                                | Hao <sup>[45]</sup>       |
| Dodecylamine capped Ag NPs                                     | PI                     | Aerosol jet printing | Thermal: 300 °C, 1 h                                                                                    | $\rho = \sim 1.59 \times 10^{-7} \Omega \text{ m}^*$                                         | Shankar <sup>[46]</sup>   |
| Alkylamine capped Ag NPs                                       | Photoactivated polymer | Blade-coating        | Chemical: reduction with irradiated polymer surface<br>No post-processing<br>Post processing at < 80 °C | $\rho = \sim 1.00 \times 10^{-6} \Omega \text{ m}$<br>$1.00 \times 10^{-7} \Omega \text{ m}$ | Yamada <sup>[47]</sup>    |

|                                   |                           |                    |                                                 |                                                |                           |
|-----------------------------------|---------------------------|--------------------|-------------------------------------------------|------------------------------------------------|---------------------------|
| Ag NPs capped with octylamine     | Photo-paper               | Direct pen writing | Thermal: 100 °C, 1 h                            | $\rho = 3.06 \times 10^{-7} \Omega \text{ m}$  | Ghosale <sup>[49]</sup>   |
| PAA capped Ag NPs                 | Photo-paper               | Inkjet printing    | Thermal: 180 °C, 15 min, (air drying for 1 day) | $\rho = 3.70 \times 10^{-8} \Omega \text{ m}$  | Shen <sup>[51]</sup>      |
| PAA-alkanolamine capped Ag NPs    | PI                        | Screen printing    | Thermal: 250 °C, 1 h                            | $\rho = 5.60 \times 10^{-8} \Omega \text{ m}$  | Shao <sup>[52]</sup>      |
| PAA capped Ag NPs                 | PET                       | Screen printing    | Thermal: 120 °C, 1 h                            | $\rho = 1.52 \times 10^{-7} \Omega \text{ m}$  | Huang <sup>[53]</sup>     |
| PAA capped Ag NPs                 | Platinum coated Si wafers | 3D printing        | Thermal: 250 °C, 1 h                            | $\rho = < 10^{-6} \Omega \text{ m}$            | Lee <sup>[55]</sup>       |
| CHBP capped Ag NPs                | Photo-paper               | Inkjet printing    | Thermal: 180 °C, 1 h 20 min, 30 printed layers  | $\rho = 10.83 \times 10^{-8} \Omega \text{ m}$ | Hao <sup>[56]</sup>       |
| PVP capped Ag NPs                 | PET                       | Screen printing    | Thermal: 160 °C, 1 h 15 min                     | $\rho = 3.83 \times 10^{-8} \Omega \text{ m}$  | Ding <sup>[57]</sup>      |
| PVP capped Ag NPs                 | Photo-paper               | Inkjet printing    | Thermal: 300 °C, 30 min                         | $\rho = 5.60 \times 10^{-8} \Omega \text{ m}$  | Fernandes <sup>[58]</sup> |
| Sodium citrate capped Ag NPs      | Glass                     | Blade-coating      | Thermal: 180 °C, 20 min                         | $\rho = 1.56 \times 10^{-7} \Omega \text{ m}$  | Yin <sup>[59]</sup>       |
| In situ fabrication of Ag NP inks | Cotton fabric             | Dip coating        | Thermal: 200 °C, 30 min                         | Rs: 5.20 $\Omega \text{ sq}^{-1}$              | Kardarian <sup>[62]</sup> |

|                                 |               |                 |                                                                                              |                                                                                         |                          |
|---------------------------------|---------------|-----------------|----------------------------------------------------------------------------------------------|-----------------------------------------------------------------------------------------|--------------------------|
| Sodium citrate capped Ag NPs    | Cotton fabric | Screen printing | Thermal: 60 °C, 30 min, in presence of HCl catalyst                                          | $\rho = 2.00 \times 10^{-5} \Omega \text{ m}$                                           | Wang <sup>[63]</sup>     |
| PAA Na stabilized Ag NPs        | PET           | Inkjet printing | Self-sintering at RT using NaCl as destabilizer<br>Chemical: HCl vapor as destabilizer, 10 s | $\rho = 1.60 \times 10^{-7} \Omega \text{ m}$<br>$3.84 \times 10^{-8} \Omega \text{ m}$ | Grouchko <sup>[54]</sup> |
| Bimodal Ag NPs ink              | Photo-paper   | Inkjet printing | Air drying at RT, 17 printing and drying cycles                                              | $\rho = 3.66 \times 10^{-8} \Omega \text{ m}$                                           | Liu <sup>[65]</sup>      |
| Polyvinyl bromide capped Ag NPs | Paper         | Direct- drawing | Thermal: 110 °C, 5 h                                                                         | $\rho = 6.70 \times 10^{-8} \Omega \text{ m}$                                           | Murtaza <sup>[66]</sup>  |

[a] \*Values have been extrapolated from graphs in the research paper.

**Table S3.** Summary of Cu MOD inks

| Ink composition                               | Substrate/s | Deposition technique       | Sintering (Pre-sintering) Conditions                                      | Resistivity/Resistance                                                                         | Reference             |
|-----------------------------------------------|-------------|----------------------------|---------------------------------------------------------------------------|------------------------------------------------------------------------------------------------|-----------------------|
| Cuf + $\alpha$ -terpinol + dispersion agent   | PI          | Screen printing            | Laser, under N <sub>2</sub>                                               | $\rho = 1.86 \times 10^{-7} \Omega \text{ m}$                                                  | Joo <sup>[72]</sup>   |
| Cuf + $\alpha$ -terpinol + dispersion agent   | PI          | Screen printing            | Thermal: 275 °C, 1 h, under N <sub>2</sub><br>Laser, under N <sub>2</sub> | $\rho = 1.30 \times 10^{-7} \Omega \text{ m}$<br>$\rho = 1.41 \times 10^{-7} \Omega \text{ m}$ | Joo <sup>[73]</sup>   |
| Cuf+ PVP + ethylene glycol + 2-methoxyethanol | PI, PET     | Rollerball pen             | IPL                                                                       | $\rho = 4.62 \times 10^{-8} \Omega \text{ m}$                                                  | Wang <sup>[74]</sup>  |
| Cuf in distilled water                        | Glass       | Reactive transfer printing | Thermal: 200 °C, 30 min; under N <sub>2</sub>                             | $\rho = 3.29 \times 10^{-8} \Omega \text{ m}$                                                  | Rosen <sup>[75]</sup> |

|                                                            |                           |                                                |                                                                                       |                                                                                                                                                                             |                        |
|------------------------------------------------------------|---------------------------|------------------------------------------------|---------------------------------------------------------------------------------------|-----------------------------------------------------------------------------------------------------------------------------------------------------------------------------|------------------------|
| Cuf + SWCNT + PVP                                          | PI                        | Screen printing                                | IPL (dried at 70 °C for 5 min)                                                        | Resistance: 9.26 Ω                                                                                                                                                          | Rosen <sup>[76]</sup>  |
| Cuf + <i>n</i> -octylamine                                 | Glass                     | Screen printing                                | Thermal: 140 °C, 1 h, under N <sub>2</sub> (dried at RT for 30 min)                   | $\rho = 2.00 \times 10^{-7} \Omega \text{ m}$                                                                                                                               | Yabuki <sup>[77]</sup> |
| Cuf + 20:80 blend of dibutylamine and <i>n</i> -octylamine | Glass                     | Screen printing                                | Thermal: 140 °C, 30 min, under N <sub>2</sub>                                         | $\rho = 5.00 \times 10^{-8} \Omega \text{ m}$                                                                                                                               | Yabuki <sup>[78]</sup> |
| Cuf + AMP + octylamine + hexanoic acid                     | Glass                     | Drop-coating                                   | Thermal: 200 °C, 30 min, under N <sub>2</sub><br>350 °C, 30 min, under N <sub>2</sub> | $\rho = 2.34 \times 10^{-7} \Omega \text{ m}$<br>$9.46 \times 10^{-8} \Omega \text{ m}$                                                                                     | Shin <sup>[79]</sup>   |
| Cuf + DEAPD                                                | Glass                     | Screen printing                                | Thermal: 180 °C, 5 min                                                                | $\rho = 3.00 \times 10^{-6} \Omega \text{ m}$                                                                                                                               | Yabuki <sup>[80]</sup> |
| Cuf + AMP (hydrated)<br>Cuf + AMP (dehydrated)             | Glass, PET, PEN           | Screen printing                                | Thermal: 190 °C, under N <sub>2</sub>                                                 | $\rho = 1.05 \times 10^{-7} \Omega \text{ m}$<br>$4.50 \times 10^{-7} \Omega \text{ m}$                                                                                     | Farraj <sup>[15]</sup> |
| Cuf + 1:1 butylamine:octylamine                            | Glass<br>PI<br>PET<br>PEN | Drop-coating                                   | Thermal: 200 °C, 40 min<br>180 °C, 20 min<br>160 °C, 20 min<br>160 °C, 20 min         | $\rho = 4.28 \times 10^{-8} \Omega \text{ m}$<br>$9.69 \times 10^{-8} \Omega \text{ m}$<br>$2.29 \times 10^{-7} \Omega \text{ m}$<br>$2.14 \times 10^{-7} \Omega \text{ m}$ | Xu <sup>[14]</sup>     |
| Cuf + monoisopropanolamine                                 | Glass                     |                                                | Thermal: 140 °C, 5 min, under N <sub>2</sub>                                          | $\rho = 2.00 \times 10^{-7} \Omega \text{ m}$                                                                                                                               | Huang <sup>[81]</sup>  |
| Cuf + 2 wt% water + 95:5 2-ethylhexylamine:AMP             | PI                        | Drop-coating                                   | Thermal: 250 °C, 30 min, under N <sub>2</sub>                                         | $\rho = 5.20 \times 10^{-8} \Omega \text{ m}$                                                                                                                               | Xu <sup>[82]</sup>     |
| Cuf + 1,2-diaminepropane                                   | PI                        | Drop-coating, spin-coating, direct pen writing | Thermal: 180 °C, 1 min                                                                | $\rho = 1.80 \times 10^{-7} \Omega \text{ m}$                                                                                                                               | Dong <sup>[83]</sup>   |

|                                                                        |                |                       |                                                                                                                             |                                                                                                                                   |                        |
|------------------------------------------------------------------------|----------------|-----------------------|-----------------------------------------------------------------------------------------------------------------------------|-----------------------------------------------------------------------------------------------------------------------------------|------------------------|
| Cuf + pentylamine                                                      | Glass          | Screen printing       | Thermal: 110 °C, 30 min, under N <sub>2</sub>                                                                               | $\rho = 5.70 \times 10^{-8} \Omega \text{ m}$                                                                                     | Yabuki <sup>[84]</sup> |
| Cuf + 60:40 3-butylpyridine:2-ethyl-1-hexylamine                       | PEN            | Doctor-blade-coating  | Thermal: 170 °C, < 5 min, under N <sub>2</sub>                                                                              | $\rho = 6.50 \times 10^{-8} \Omega \text{ m}$                                                                                     | Paquet <sup>[85]</sup> |
| Cuf + 1,2-diethanolamine                                               | Glass          | Mask printing         | Laser                                                                                                                       | $\rho = 5.60 \times 10^{-7} \Omega \text{ m}$                                                                                     | Araki <sup>[87]</sup>  |
| Cuf + hexylamine + AMP                                                 | PI             | Spin-coating          | Laser (dried at 70 °C for 10 min)                                                                                           | $\rho = 1.70 \times 10^{-7} \Omega \text{ m}$                                                                                     | Lee <sup>[88]</sup>    |
| Cuf + hexylamine + AMP                                                 | PI             | Spin-coating          | Laser (dried at 70 °C for 10 min)<br>Thermal, 150 °C, 1 h furnace cycle to RT                                               | $\rho = 1.92 \times 10^{-7} \Omega \text{ m}$<br>$\rho = 1.70 \times 10^{-7} \Omega \text{ m}$                                    | Lee <sup>[89]</sup>    |
| Cuf + hexylamine + AMP                                                 | PI             | Spin-coating          | Laser under N <sub>2</sub> (dried at 70 °C for 10 min)                                                                      | $1.74 \times 10^{-7} \Omega \text{ m}$                                                                                            | Min <sup>[90]</sup>    |
| Cuf-AMP                                                                | PEN            | Screen printing       | N <sub>2</sub> plasma, 8 min (dried 100 °C for 10 min)                                                                      | $7.30 \times 10^{-8} \Omega \text{ m}$                                                                                            | Farraj <sup>[91]</sup> |
| Copper glycolate + cyclohexylamine<br>Copper acetate + cyclohexylamine | Glass<br>Glass | Drop-coating          | Thermal: 290 °C, 1 h, under N <sub>2</sub> (dried in oven at 60 °C for 2 h)<br>220 °C, 1 h (dried in oven at 60 °C for 2 h) | $\rho = 3.85 \times 10^{-7} \Omega \text{ m}$<br>$7.50 \times 10^{-7} \Omega \text{ m}$                                           | Yang <sup>[92]</sup>   |
| Copper acetate + cyclohexylamine                                       | PI             | Drop-coating          | Thermal: 250 °C, 1 h, under N <sub>2</sub>                                                                                  | $\rho = 2.20 \times 10^{-7} \Omega \text{ m}$                                                                                     | Yang <sup>[93]</sup>   |
| Copper oleate<br>Copper glycolate<br>Copper lactate                    | Glass          | Solution-drop-coating | Thermal: 250 °C, 1 h, under N <sub>2</sub>                                                                                  | $\rho = 2.10 \times 10^{-4} \Omega \text{ m}$<br>$2.30 \times 10^{-7} \Omega \text{ m}$<br>$4.40 \times 10^{-7} \Omega \text{ m}$ | Deng <sup>[94]</sup>   |



|                                                                |                  |                 |                                               |                                               |                        |
|----------------------------------------------------------------|------------------|-----------------|-----------------------------------------------|-----------------------------------------------|------------------------|
| Copper nitrate hydroxide + fructose                            | Ryonet mesh grid | Screen printing | IPL                                           | $\rho = 1.25 \times 10^{-6} \Omega \text{ m}$ | Draper <sup>[95]</sup> |
| Copper nitrate + ethylenediamine/ethanolamine/amino-2-propanol | Glass            | Inkjet printing | Ar/H <sub>2</sub> plasma, 40 min              | $\rho = 1.50 \times 10^{-6} \Omega \text{ m}$ | Knapp <sup>[96]</sup>  |
| Copper hydroxide DMAPD + formic acid                           | Glass            | Blade coating   | Thermal: 200 °C, 30 min, under N <sub>2</sub> | $\rho = 1.39 \times 10^{-6} \Omega \text{ m}$ | Qi <sup>[97]</sup>     |

**Table S4.** Summary of Cu NP inks

| Ink composition                                          | Substrate/s            | Deposition technique       | Sintering (Pre-sintering) Conditions                                                        | Resistivity/Resistance                                                                                                                                                      | Reference             |
|----------------------------------------------------------|------------------------|----------------------------|---------------------------------------------------------------------------------------------|-----------------------------------------------------------------------------------------------------------------------------------------------------------------------------|-----------------------|
| Cu NPs capped with PVP & CTAB, lactic acid as protectant | Glass                  | Drop-coating               | Thermal: 200 °C, 30 min, under N <sub>2</sub> (dried in vacuum for 1 h)                     | $\rho = 1.40 \times 10^{-7} \Omega \text{ m}$                                                                                                                               | Deng <sup>[110]</sup> |
| Cu NPs capped with lactic acid                           | Glass                  | Pastes deposited on slides | Thermal: 200 °C, 1 h, under N <sub>2</sub> (dried under vacuum for 1 h)                     | $\rho = 9.10 \times 10^{-8} \Omega \text{ m}$                                                                                                                               | Deng <sup>[103]</sup> |
| Cu NPs capped with formic acid                           | Glass                  | Spin-coating               | Thermal: 250 °C, 1 h, under N <sub>2</sub>                                                  | $\rho = 1.35 \times 10^{-7} \Omega \text{ m}$                                                                                                                               | Kim <sup>[112]</sup>  |
| Cu NPs capped with oleic acid                            | PI<br>PI<br>PES<br>PET | Airbrush printing          | Thermal<br>Photonic: 2.5 kV, 1.5 ms<br>Photonic: 2.0 kV, 1.5 ms<br>Photonic: 2.3 kV, 1.5 ms | $\rho = 5.90 \times 10^{-8} \Omega \text{ m}$<br>$6.70 \times 10^{-8} \Omega \text{ m}$<br>$1.91 \times 10^{-7} \Omega \text{ m}$<br>$5.12 \times 10^{-7} \Omega \text{ m}$ | Oh <sup>[101]</sup>   |
| Bimodal Cu NP ink capped with oleic acid                 | Glass                  | Spin-coating               | Laser (dried in air at RT)                                                                  | $\rho = 4.60 \times 10^{-8} \Omega \text{ m}$                                                                                                                               | Park <sup>[113]</sup> |
| Bimodal Cu NPs capped with PVP                           | PI                     | Screen printing            | Flashlight sintering (dried using near IR at 100 °C for 20 min)                             | $\rho = 5.68 \times 10^{-8} \Omega \text{ m}$                                                                                                                               | Yu <sup>[111]</sup>   |

|                                                     |                |                      |                                                                                              |                                                                                         |                               |
|-----------------------------------------------------|----------------|----------------------|----------------------------------------------------------------------------------------------|-----------------------------------------------------------------------------------------|-------------------------------|
| PEG-2000 protected Cu NPs                           | PI             | Screen printing      | Thermal: 250 °C, 30 min, under N <sub>2</sub>                                                | $\rho = 1.58 \times 10^{-7} \Omega \text{ m}$                                           | Zhang <sup>[98]</sup>         |
| Cu NPs stabilized with AP                           | PI             | Bar-coating          | Thermal: 150 °C, 15 min, under N <sub>2</sub> (dried at 80 °C for 1 h under N <sub>2</sub> ) | $\rho = 3.00 \times 10^{-7} \Omega \text{ m}$                                           | Hokita <sup>[114]</sup>       |
| Cu NPs stabilized with AP + oxalic acid + Cu flakes | PI             | Doctor-blade-coating | Thermal: 120 °C, 1 h, under N <sub>2</sub>                                                   | $\rho = 8.40 \times 10^{-8} \Omega \text{ m}$                                           | Kanzaki <sup>[115]</sup>      |
| 2-amino-1-butanol protected Cu NPs                  | PI             | Bar-coating          | Thermal: 150 °C, 30 min, under N <sub>2</sub>                                                | $\rho = 5.20 \times 10^{-7} \Omega \text{ m}$                                           | Sugiyama <sup>[116]</sup>     |
| Graphene coated NPs                                 | PI<br>Si wafer | CVD                  | CVD maintained at 230 °C for 2 h                                                             | $\rho = 1.70 \times 10^{-6} \Omega \text{ m}$<br>$1.40 \times 10^{-6} \Omega \text{ m}$ | Tseng <sup>[117]</sup>        |
| Cu NPS chelated with NTA                            | Glass          | Screen printing      | Thermal: 260 °C, 30 min, under N <sub>2</sub>                                                | $\rho = 1.00 \times 10^{-7} \Omega \text{ m}$                                           | Kamikoriyama <sup>[118]</sup> |
| Cu NPs capped with trisodium citrate dihydrate      | Glass          | Doctor-blade-coating | Thermal: 300 °C, 1 h, under Ar (dried for 30 min under vacuum)                               | $\rho = 8.20 \times 10^{-8} \Omega \text{ m}$                                           | Yokoyama <sup>[119]</sup>     |
| Cu NPs + trisodium citrate + CTAB                   | Photo-paper    | Direct pen writing   | Thermal: 160 °C, 2 h, under Ar                                                               | $\rho = 7.20 \times 10^{-8} \Omega \text{ m}$                                           | Li <sup>[120]</sup>           |

**Table S5.** Summary of AI MOD and NP inks

| Ink composition | Substrate/s | Deposition Technique             | Sintering Conditions                                           | Resistivity/Resistance                                | Reference            |
|-----------------|-------------|----------------------------------|----------------------------------------------------------------|-------------------------------------------------------|----------------------|
| nBEA + TTIP     | Glass, PET  | Solution-stamping in Ar glovebox | Chemical and thermal: TTIP substrate, 150 °C, <1 min, under Ar | $\rho \approx 8.00 \times 10^{-8} \Omega \text{ m}^*$ | Lee <sup>[125]</sup> |

|                          |                                                |                                          |                                                                                                    |                                                            |                          |
|--------------------------|------------------------------------------------|------------------------------------------|----------------------------------------------------------------------------------------------------|------------------------------------------------------------|--------------------------|
| nBEA                     | Paper                                          | Solution-stamping in Ar glovebox         | Chemical and thermal: TTIP treated substrate, 110 °C, 1 min, under Ar                              | $R_s \leq 2 \Omega \text{ sq}^{-1}$                        | Lee <sup>[126]</sup>     |
| nBEA                     | PET                                            | Solution-dipping                         | Chemical: TTIP substrate, solution-dipped at RT for 20 min, dried at RT, under Ar                  | $R_s = \sim 2.60 \Omega \text{ sq}^{-1}$                   | Lee <sup>[127]</sup>     |
| nBEA                     | Tissue paper                                   | Solution-dipping                         | Chemical: TTIP substrate solution-dipped for 2 h, dried at RT, under Ar                            | $R_s = \sim 0.700 \Omega \text{ sq}^{-1}$                  | Choi <sup>[128]</sup>    |
| nBEA                     | PI                                             | Slit-die-coating (roll-to-roll printing) | Chemical and thermal: TTIP treated substrate 150 °C, web speed of 3 m min <sup>-1</sup> , under Ar | $\rho = 1.70 \times 10^{-7} \Omega \text{ m}$              | Jung <sup>[129]</sup>    |
| iPEA                     | PET                                            | Solution-stamping                        | Chemical and thermal: TiCl <sub>4</sub> treated substrate, 80 °C, 30 s, under inert conditions     | $R_s = 2.09 \Omega \text{ sq}^{-1}$                        | Fei <sup>[133]</sup>     |
| TMAA                     | Glass                                          | Solution-stamping                        | Chemical and thermal: TTIP treated substrate, 130 °C, 1 min, under Ar                              | $\rho = 5.80\text{--}7.00 \times 10^{-8} \Omega \text{ m}$ | Lee <sup>[134]</sup>     |
| TEAA                     | Substrate patterned with platinum nanocrystals | Solution-dipping                         | Thermal: 105–120 °C, 30 min–2 h, under N <sub>2</sub>                                              | $\rho = 2.80\text{--}3.50 \times 10^{-8} \Omega \text{ m}$ | Shen <sup>[135]</sup>    |
| TEAA                     | Glass                                          | Drop-coating                             | Thermal: 120 °C, 30 s, under N <sub>2</sub>                                                        | $\rho = 4.25 \times 10^{-7} \Omega \text{ m}$              | Douglas <sup>[136]</sup> |
| Oleic acid capped Al NPs | Glass                                          | Spin-coating                             | Thermal: 600 °C, under Ar/H <sub>2</sub> environment                                               | $\rho = 4.12 \times 10^{-7} \Omega \text{ m}$              | Lee <sup>[122]</sup>     |

[a] \*Values have been extrapolated from graphs in the paper.
